# Supplementary material for: Mutagenesis of the Varicella-Zoster Virus Genome Demonstrates That VLT and VLT-ORF63 Proteins Are Dispensable for Lytic Infection
Source: MDPI journal article supplement (doi:10.3390/v13112289), 2021-11-16
Supplement: s1 [file s1]

## SUPPLEMENTARY FIGURE S1

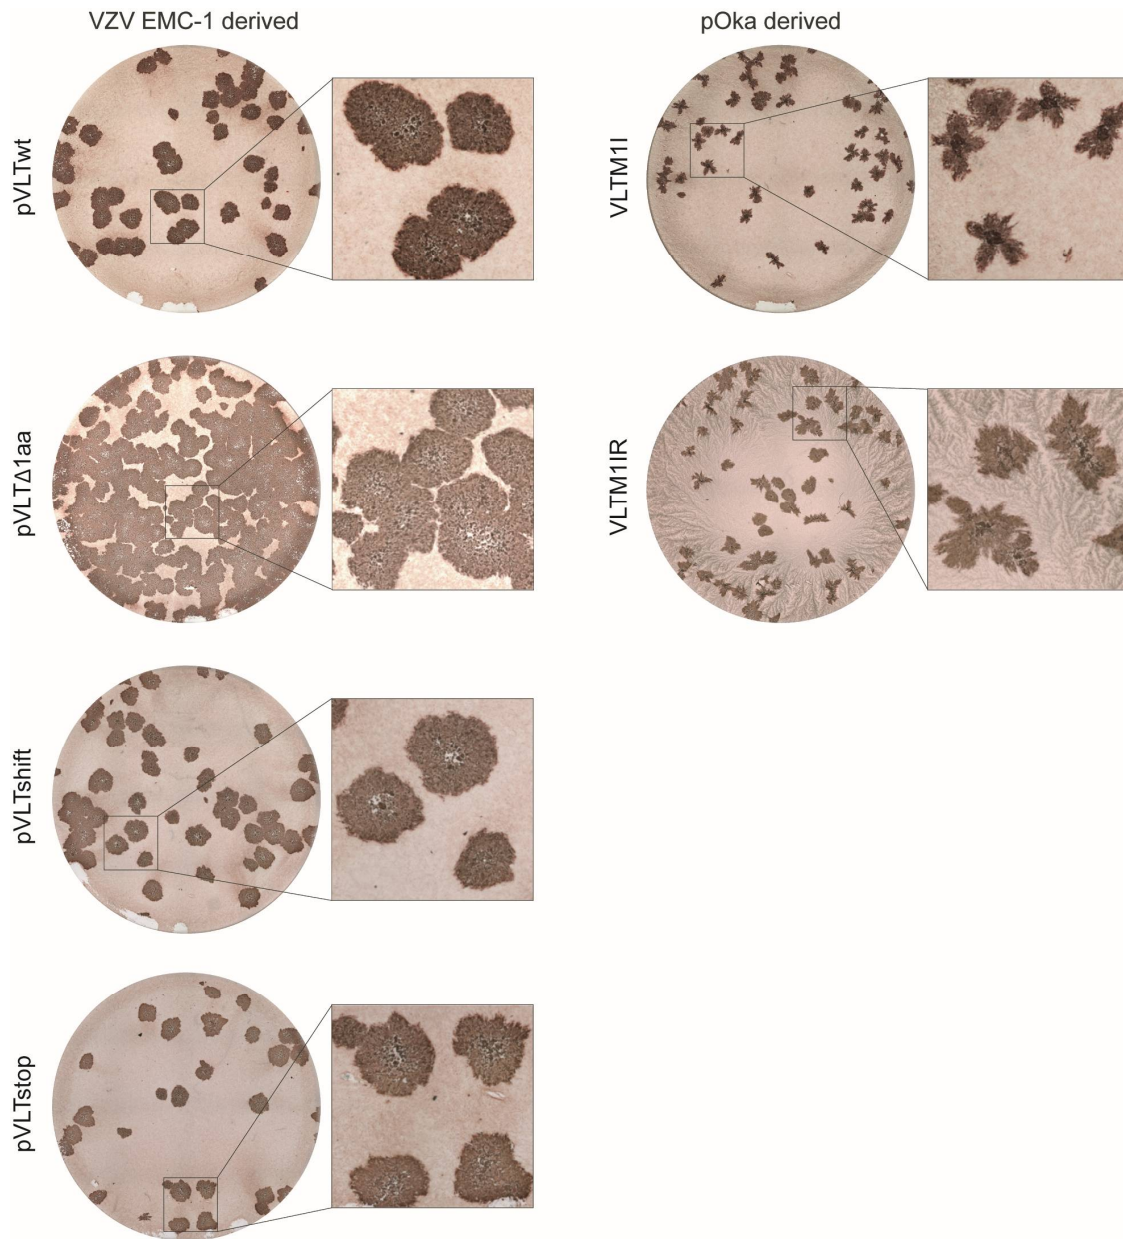

**Figure S1:** Comparison of infectious foci produced by VZV EMC-1 and VZV pOka derived viruses. Infectious focus assay of CRISPR/Cas9-derived (EMC-1 based) viruses (left) and BAC-derived (pOka based) viruses (right) on ARPE-19 cells at six days post-infection. Infected wells were stained for VZV glycoprotein E by immunohistochemistry.
