# Supplementary material for: Mutagenesis of the Varicella-Zoster Virus Genome Demonstrates That VLT and VLT-ORF63 Proteins Are Dispensable for Lytic Infection
Source: Viruses. 2021 Nov 16;13(11):2289. doi: 10.3390/v13112289 (PMC8619377; doi:10.3390/v13112289)
Supplement: Supplementary file 1 [file viruses-13-02289-s001.zip]

Archive with 4 entries (4 files):
- Supplementary Figure S1.pdf
- Supplementary Table S1 - sgRNAs.xlsx
- Supplementary Table S2 - primers.xlsx
- Supplementary Table S3 - Illumina sequencing.xlsx
