# Supplementary material for: Mutagenesis of the Varicella-Zoster Virus Genome Demonstrates That VLT and VLT-ORF63 Proteins Are Dispensable for Lytic Infection
Source: Viruses. 2021 Nov 16;13(11):2289. doi: 10.3390/v13112289 (PMC8619377; doi:10.3390/v13112289)
Supplement: Supplementary file 1 [file viruses-13-02289-s001.zip › Supplementary Table S1 - sgRNAs.xlsx]

## Sheet: Blad1
Target	gRNA	Selection	Sequence
ORF8 CDS	ORF8-1	puromycin	GACATCAACCGTTGTTACTC
ORF8 CDS	ORF8-2	puromycin	GAAAAATCTGTAACACGGGG
ORF11 CDS	ORF11-1	puromycin	GTCGGGTCATTATAACCGG
ORF11 CDS	ORF11-2	puromycin	gCACGTTATCGGTCAACCAAT
VLT exon 1	VLT-1	blasticidin	gCAACTGGATAGTCTGCAAGG
VLT exon 1	VLT-2	blasticidin	GACCCGTTTAAAATGCCAAC
VLT exon 2	VLT-3	puromycin	gCGGGCATTCCGAATCGTGTA
VLT exon 2	VLT-4	puromycin	gATCCGGTCTCGGAGTAACCG
VLT intron 1	VLT-5	puromycin	GGGTAAAGCAAACTTGCGGG
VLT intron 1	VLT-6	puromycin	gCAAACTTGCGGGGGGATAAA
VLT exon 2	VLT-7	puromycin	gTACGACCAATAGCAACACTC
VLT exon 2	VLT-8	puromycin	gAAATACCTGAGTGTTGCTAT
VLT exon 2	VLT-9	puromycin	GAGTGTTGCTATTGGTCGTA
VLT upstream exon	VLT-10	blasticidin	GTCCATGCTTCCATTAGAG
VLT upstream exon	VLT-11	blasticidin	GACACCAAGAGTTTAACTAA
VLT upstream exon	VLT-12	blasticidin	gTTGGCCTTTAGTTAAACTCT
			*g: not part of genomic target
