# Supplementary material for: Mutagenesis of the Varicella-Zoster Virus Genome Demonstrates That VLT and VLT-ORF63 Proteins Are Dispensable for Lytic Infection
Source: Viruses. 2021 Nov 16;13(11):2289. doi: 10.3390/v13112289 (PMC8619377; doi:10.3390/v13112289)
Supplement: Supplementary file 1 [file viruses-13-02289-s001.zip › Supplementary Table S2 - primers.xlsx]

## Sheet: Supplementary Table 2
Target	Name	Primer sequence	Belongs to
RNA 29	ORF29_probe	6-FAM - BHQ1; TCC-AAC-CTG-TTT-TGC-GGC-GGC	Figure 4A/5D/6B
	ORF29_Fw	GGC-GGA-ACT-TTC-GTA-ACC-AA
	ORF29_Rv	CCC-CAT-TAA-ACA-GGT-CAA-CAA-AA
RNA 60	ORF60_probe	6-FAM - BHQ-1; TTC-ACC-AAC-AGA-TTG-TGC-CAG-CC	Figure 4A/5D/6B
	ORF60_Fw	CAA-ATG-GCG-TAC-TGG-ACA-AAT-C
	ORF60_Rv	GTC-TAC-CCA-TAC-CCA-GGA-AAG
RNA 61	ORF61_probe	6-FAM - BHQ1; GGA-GTC-CAT-CCA-ACA-GCC-AAC-AT	Figure 4A/5D/6B
	ORF61_Fw	AGA-TCT-TCT-GCC-ACC-AAG-CC
	ORF61_Rv	TGG-TGA-TTG-AAT-GGG-CTC-CC
RNA 63	VZV_ORF63_Probe	6-FAM - BHQ1; TGT-CCC-ATC-GAC-CCC-CTC-GG	Figure 4A/5D/6B
	VZV_ORF63_Fw	GCT-TAC-GCG-CTA-CTT-TAA-TGG-AA
	VZV_ORF63_Rv	GCC-TCA-ATG-AAC-CCG-TCT-TC
VLT	VLT3-4_Probe	6-FAM - BHQ1; GAT-CGA-ACA-GCA-GAT-GGA-TTG-CAC	Figure 4A/5D/6B
	VLT3-4_Fw	AAT-CGA-GCC-ATA-CAC-CAC-CG
	VLT3-4_Rv	TGT-ATT-CGG-GCA-TGG-ACC-TC
VLT exon 1C	VLT_E1C_Fw	CCC-AAC-GGC-CAT-TAT-CCC-TT	Figure 3C
VLT exon 1C	CRISPR_seq_Fw	CAC-GTT-TCC-TTC-TAT-CCG-TTT-CAA-TC	Figure 3E
VLT exon 2	ORF61-10	GCT-ATT-GGT-CGT-AAG-GGT-TGG	Figure 3B/C/E
VLT intron 2	ORF61-6	ATC-CAA-CCC-GCC-TAA-CCA-TG	Figure 5B / Table 1
VLT exon 2	ORF61-9	ATT-TGC-AGA-GCA-GGA-TGC-CC	Figure 5B / Table 1
VLT exon 1	ORF61-13	ACC-GAA-AAC-ACC-GTT-GCC-TTT	Figure 3B / 6A
VLT exon 5	VLT_exon5_Rv	GGG-GTG-GAG-AAA-TGT-CTT-CGT	Figure 6A
ORF8	ORF8_CRISPR_Fw	GTA-GCC-AAA-CTA-TTC-CGA-ATC-GG	Figure 1B/1E
ORF8	ORF8_CRISPR_Rv	AAT-TGT-CTT-CAT-CAG-CAA-GGG-CA	Figure 1B/1E
ORF11	ORF11_CRISPR_Fw	ATA-TGG-TAT-GTC-TGT-CAT-GTG-CT	Figure 1C
ORF11	ORF11_CRISPR_Rv	CGG-ATC-CAT-TAT-ATG-TAG-AAT-GAT-GTA-AGG	Figure 1C
VLT exon 2	NheI_VLT_Fw	GCA-GCT-AGC-ATG-CCC-CGG-TTA-CTC-CG	Figure 5C
VLT exon 5	VLT_Rv_BamHI	CGT-GGA-TCC-TTA-TTT-ACG-GGT-ATT-ACA-GGG-G	Figure 5C
upstream of VLT exon 1	pOka100798ecoF	ACC-GAA-TTC-TCA-GGG-GAA-ATG-TTA-AAC-TTG	Figure 6A
VLT exon 5	pOka104820salR	ACC-GTC-GAC-CTT-CCT-ATA-TAC-AGT-GC	Figure 6A
VLT exon 2	VLTG3A	TAT-TTG-CAG-AGC-AGG-ATA-CCC-CGG-TTA-CTC-CGA	Figure 6A
VLT exon 1	pOka102501ampsacF	TTT-ATC-CCC-CCG-CAA-GTT-TGC-TTT-ACC-CTC-GCC-TTC-ACC-ACC-CCC-GCC-ACG-GCA-GCG-GTA-TCA-TCA-AC-GGG-GTC-TG	Figure 6A
VLT intron 4	pOka104500ampsacR	AGT-TCT-GCT-ACG-TGT-TTG-GAT-GCC-CGG-ACA-TTA-GAA-TAC-AGC-CAG-TTG-TTA-CCG-GAT-CCC-CGG-GTA-CCG-AGC-TC	Figure 6A
