# Supplementary material for: Mutagenesis of the Varicella-Zoster Virus Genome Demonstrates That VLT and VLT-ORF63 Proteins Are Dispensable for Lytic Infection
Source: Viruses. 2021 Nov 16;13(11):2289. doi: 10.3390/v13112289 (PMC8619377; doi:10.3390/v13112289)
Supplement: Supplementary file 1 [file viruses-13-02289-s001.zip › Supplementary Table S3 - Illumina sequencing.xlsx]

## Sheet: SNPs analysis
Position (Dumas)	Reference (NC_001348.1)	variant	pVLTwt	pVLTΔ1aa	pVLTshift	pVLTstop	Note	Status	Location	Substitution type	Impact
9056	T	C	0	0	0	0.993	major SNP	strain variation	ORF7	Synonymous
16047	T	C	0	0	0	0.996	major SNP	strain variation	ORF11	Nonsynonymous	3AA C-terminal extesion
19315	A	+C	0.90149	0.0205523	0.0285591	0.0300375	major insertion	strain variation	ORF13	Nonsynonymous	Frameshift, leading to replacement and extension of 7AA (LKMEMAL) with 11 alternative AA (PKNGNGSLMDF) in the C-terminus
27484	G	A	0.995	0	0	0	major SNP	strain variation	ORF19	Synonymous
42392	A	-A	0.551	0.56	0	0.506	major deletion	strain variation	ORF23/24/25 3' UTR	non-coding
78134	C	+T	0.157333	0.138191	0.128228	0.848899	major insertion	strain variation	ORF43 5' UTR / ORF42 intron	non-coding
91086	T	C	0	0.993	0	0	major SNP	strain variation	ORF52	Synonymous
98839	T	C	0	0.996	0	0	major SNP	strain variation	ORF56	Nonsynonymous	M43H
102958	C	-CCTTACGA	0	0	0	0.974	major deletion	strain variation	VLT
102962	A	-ACG	0	0.974	0	0	major deletion	strain variation	VLT
102964	G	-G	0	0	0.967	0	major deletion	strain variation	VLT
103007	G	T	0.995	0	0	0	major SNP	strain variation	VLT intron / ORF61 3' UTR	non-coding
105006	C	+C	0.818115	0.252475	0.17284	0.705807	major insertion	strain variation	intergenic	non-coding
105007	T	G / C	0.744	0.833	0.886	0.573	major SNP	strain variation	intergenic	non-coding
105010	C	G	0.192	0.76	0.81	0.324	mixed SNP	strain variation	intergenic	non-coding
109245	G	+C	0.470777	0.90088	0	0	major insertion	strain variation	ORF62 5' UTR	non-coding
110050	G	-G / -GG	0.753	0.591	0.564	0.792	major deletion	strain variation	intergenic	non-coding
110051	G	A	0.237	0	0	0.29	minor SNP	strain variation	intergenic	non-coding
110360	T	+AA / +AAA / +AAAA	0.831473	0.815188	0.873669	0.868161	major insertion	strain variation	intergenic	non-coding
111923	T	C	0	0	0.992	0	major SNP	strain variation	ORF64	Nonsynonymous	L120P
112127	G	+A / +AA	0.882301	0.877029	0.882538	0.899246	major insertion	strain variation	ORF65 3' UTR	non-coding
117759	A	+T / +TT	0.872893	0.881707	0.873773	0.88663	major insertion	strain variation	ORF64/63 3' UTR	non-coding
117974	A	G	0	0	0.993	0	major SNP	strain variation	ORF64	Nonsynonymous	L120P
119527	G	+TT / +TTT / +TTTT	0.827352	0.804598	0.815073	0.844894	major insertion	strain variation	intergenic	non-coding
119839	C	-C / -CC	0.664	0.491	0.51	0.67	major deletion	strain variation	intergenic	non-coding
120643	A	+G	0.461029	0.91339	0.0477548	0.0512821	major insertion	strain variation	ORF62 5' UTR	non-coding
1	A	G	0.845	0.842	0.905	0.762	major SNP	conserved	ORF0 5' UTR (RNA 0.3)	non-coding
5	C	+C	0.99	0.99	0.99	0.99	major insertion	conserved	ORF0 5' UTR (RNA 0.3)	non-coding
6	A	G	0.991	0.987	0.988	0.99	major SNP	conserved	ORF0 5' UTR (RNA 0.3)	non-coding
108	A	+C	0.48703	0.538492	0.588707	0.530319	minor insertion	conserved	ORF0 5' UTR (RNA 0.3)	non-coding
118	G	C	0.367	0.343	0.409	0.32	minor SNP	conserved	ORF0 5' UTR (RNA 0.3)	non-coding
121	A	C	0.279	0.264	0.326	0.249	minor SNP	conserved	ORF0 5' UTR (RNA 0.3)	non-coding
122	G	C	0.155	0.136	0.253	0.12	minor SNP	conserved	ORF0 5' UTR (RNA 0.3)	non-coding
4258	C	T	0.993	0.995	0.992	0.995	major SNP	conserved	ORF5	Synonymous
17404	C	T	0.995	0.998	0.992	0.995	major SNP	conserved	ORF12	Synonymous
18467	G	A	0.997	0.995	0.993	0.996	major SNP	conserved	ORF13	Synonymous
19746	G	A	0.995	0.998	0.994	0.996	major SNP	conserved	ORF14	Synonymous
30971	A	C	0.994	0.996	0.996	0.999	major SNP	conserved	ORF21	Synonymous
33722	T	C	0.994	0.994	0.994	0.991	major SNP	conserved	ORF21	Synonymous
33773	G	A	0.998	0.998	0.996	0.997	major SNP	conserved	ORF21	Synonymous
40226	G	A	0.994	0.995	0.992	0.992	major SNP	conserved	ORF22	Synonymous
42242	A	C	0.99	0.992	0.996	0.993	major SNP	conserved	ORF22	Synonymous
44487	G	A	0.994	0.994	0.996	0.995	major SNP	conserved	ORF22	Synonymous
54564	T	C	0.994	0.996	0.994	0.994	major SNP	conserved	intergenic	non-coding
56021	T	C	0.991	0.995	0.994	0.995	major SNP	conserved	ORF30	Synonymous
64166	T	C	0.995	0.994	0.995	0.994	major SNP	conserved	ORF35	Synonymous
65669	C	T	0.997	0.998	0.992	0.998	major SNP	conserved	ORF36	Nonsynonymous	S288L
66879	C	T	0.996	0.996	0.994	0.991	major SNP	conserved	ORF37	Nonsynonymous	P269L
73993	T	C	0.994	0.992	0.992	0.997	major SNP	conserved	ORF40	Synonymous
77616	A	C	0.997	0.994	0.995	0.997	major SNP	conserved	ORF42	Synonymous
85686	C	T	0.993	0.99	0.988	0.993	major SNP	conserved	ORF48	Synonymous
86199	G	A	0.996	0.995	0.995	0.995	major SNP	conserved	ORF48	Synonymous
86225	G	A	0.995	0.996	0.999	0.997	major SNP	conserved	ORF48	Nonsynonymous	R520Q
90202	G	T	0.989	0.988	0.988	0.993	major SNP	conserved	ORF51	Nonsynonymous	Q774H
100151	T	G	0.993	0.994	0.991	0.997	major SNP	conserved	ORF58	Nonsynonymous	N41T
100746	C	A	0.992	0.992	0.998	0.998	major SNP	conserved	ORF59	Synonymous
104898	A	G	0.991	0.997	0.993	0.997	major SNP	conserved	VLT63 intron	non-coding
105012	T	C	0.949	0.896	0.918	0.934	major SNP	conserved	VLT63 intron	non-coding
105015	T	C	0.983	0.985	0.978	0.986	major SNP	conserved	VLT63 intron	non-coding
105046	G	-G	0.79	0.795	0.763	0.77	major deletion	conserved	VLT63 intron	non-coding
108120	A	C	0.996	0.996	0.996	0.996	major SNP	conserved	ORF62	Synonymous
109009	G	A	0.993	0.992	0.995	0.99	major SNP	conserved	ORF62	Nonsynonymous	S42L
109044	C	G	0.99	0.988	0.987	0.988	major SNP	conserved	ORF62	Synonymous
111555	G	C	0.99	0.985	0.979	0.979	major SNP	conserved	ORF64 5' UTR	non-coding
112198	G	A	0.983	0.98	0.983	0.982	major SNP	conserved	ORF65 3' UTR	non-coding
114140	A	G	0.995	0.996	0.996	0.996	major SNP	conserved	ORF66	Synonymous
117699	C	T	0.979	0.984	0.977	0.976	major SNP	conserved	ORF68 3'UTR	non-coding
118342	C	G	0.989	0.979	0.983	0.98	major SNP	conserved	ORF64 5'UTR	non-coding
120853	G	C	0.988	0.987	0.984	0.985	major SNP	conserved	ORF62	Synonymous
120888	C	T	0.991	0.994	0.991	0.994	major SNP	conserved	ORF62	Nonsynonymous	S42L
121777	T	G	0.996	0.994	0.995	0.996	major SNP	conserved	ORF62	Synonymous
124843	C	-C	0.8	0.759	0.764	0.721	major deletion	conserved	ORF0 5' UTR (RNA 0.3)	non-coding
124882	A	G	0.965	0.978	0.974	0.977	major SNP	conserved	ORF0 5' UTR (RNA 0.3)	non-coding

## Sheet: Sequence metrics
	Sample	Total reads	Post-QC	% pass QC	subsampled	Aligned vs VZV	% VZV
	VLT-WT	2674961	2664495	99.6087	1000000	803865	80.3865
	VLT-1AA	3710157	3701489	99.7664	1000000	404152	40.4151
	VLT-OUT	4260264	4250056	99.7604	1000000	556047	55.6047
	VLT-STOP	3544357	3536729	99.7848	1000000	425582	42.5581
